# Supplementary material for: Removal of the Water Pollutant Ciprofloxacin Using Biodegradable Sorbent Polymers Obtained from Polysaccharides
Source: MDPI journal article supplement (doi:10.3390/polym15153188), 2023-07-27
Supplement: s1 [file s1]

# Supplementary Materials

## Removal of the Water Pollutant Ciprofloxacin Using Biodegradable Sorbent Polymers Obtained from Polysaccharides

Sarah Alvarado <sup>1,†</sup>, Alicia Megia-Fernandez <sup>1,2,3</sup>, Mariano Ortega-Muñoz <sup>1,2,3</sup>,  
Fernando Hernandez-Mateo <sup>1,2,3</sup>, F. Javier Lopez-Jaramillo <sup>1,2,3,\*</sup> and Francisco Santoyo-Gonzalez <sup>1,2,3,\*</sup>

<sup>1</sup> Department Organic Chemistry, Faculty of Sciences, University of Granada, 18073 Granada, Spain

<sup>2</sup> Unit of Excellence in Chemistry Applied to Biomedicine and the Environment, University of Granada, 18073 Granada, Spain

<sup>3</sup> Biotechnology Institute, University of Granada, 18071 Granada, Spain

\* Correspondence: fjljara@ugr.es (F.J.L.-J.); fsantoyo@ugr.es (F.S.-G.)

† Current address: Institute for Advanced Chemistry of Catalonia, CSIC, 08034 Barcelona, Spain.

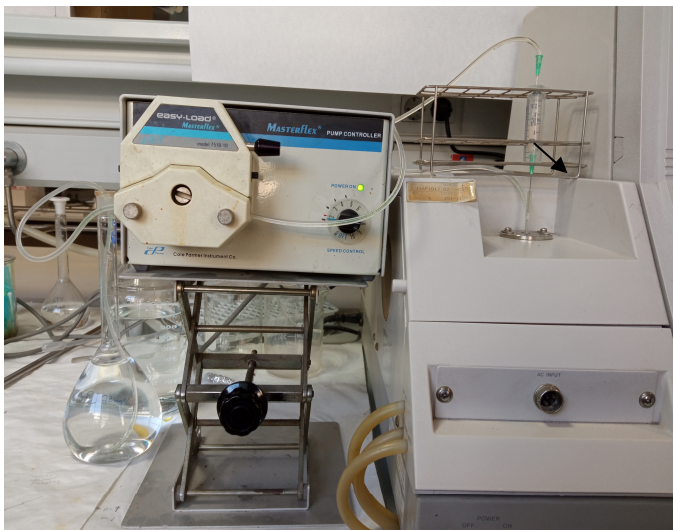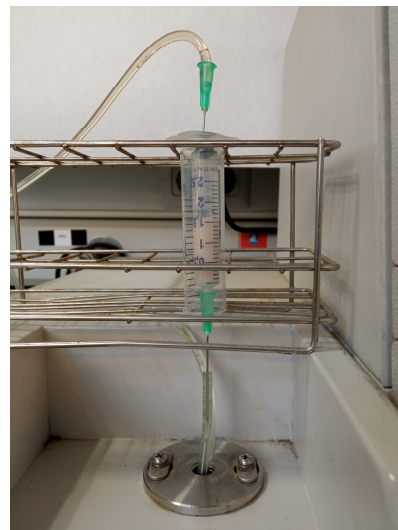

**Figure. S1.** (a) General setting for the fixed bed studies with **pSt**. (b) Detail of the **pSt** packing.

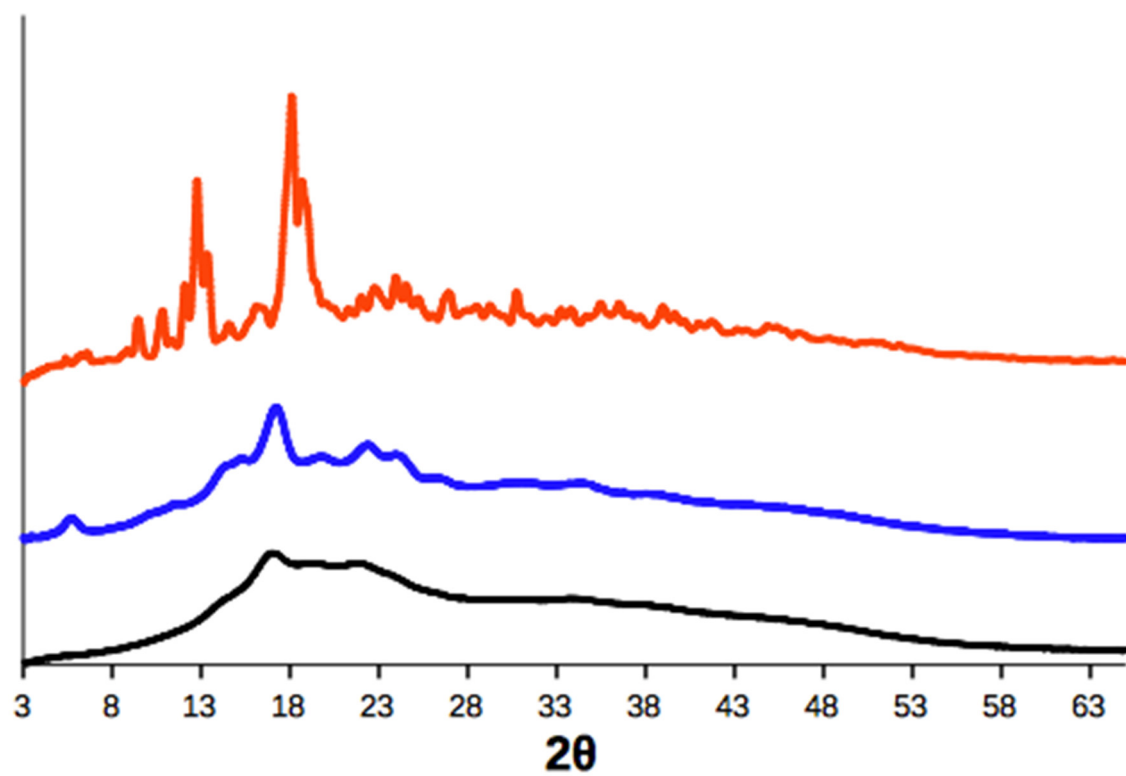

**Figure. S2.** DRX of the starting material  $\beta$ -CD (red) St (blue) and Dx (black) showing the d-spacing of some peaks.

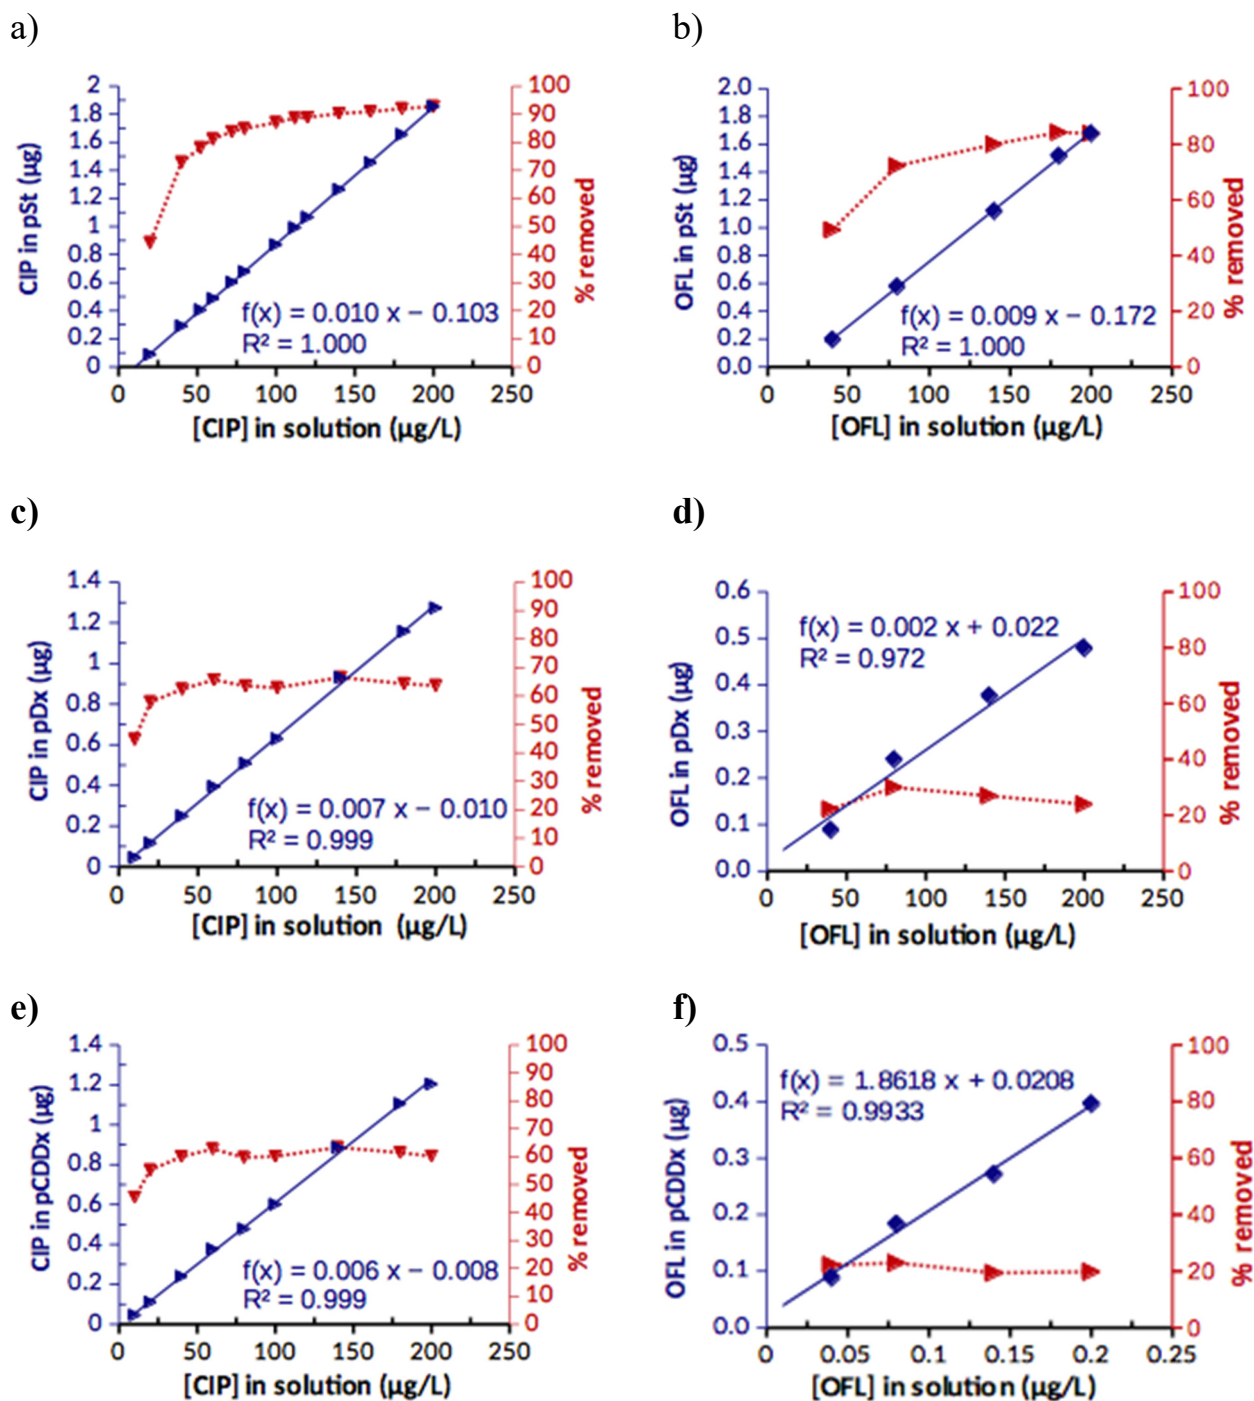

**Figure. S3.** Characterization of the polymers **pSt** (a & b), **pDx** (c & d) and **pCD-Dx** (e & f) as sorbent for CIP (a, c, e) and OFL (b, d, f). In blue, amount retained by the polymer and in red the percentage removed from the solution as a function of the initial concentration of quinolone.

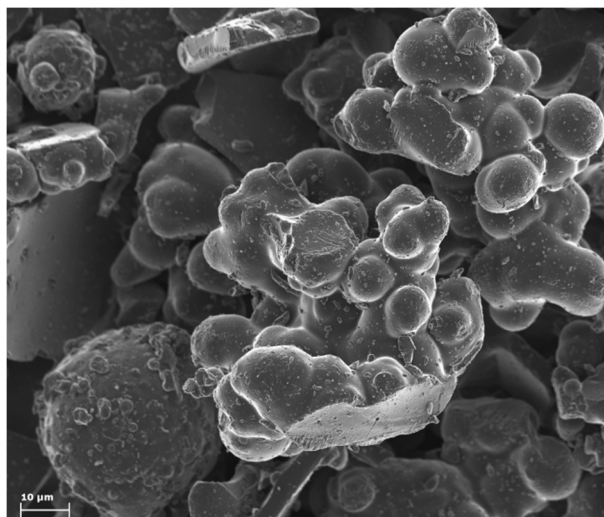

**Figure. S4.** SEM micrograph of **pCD-Dx** at 10.00 K x.

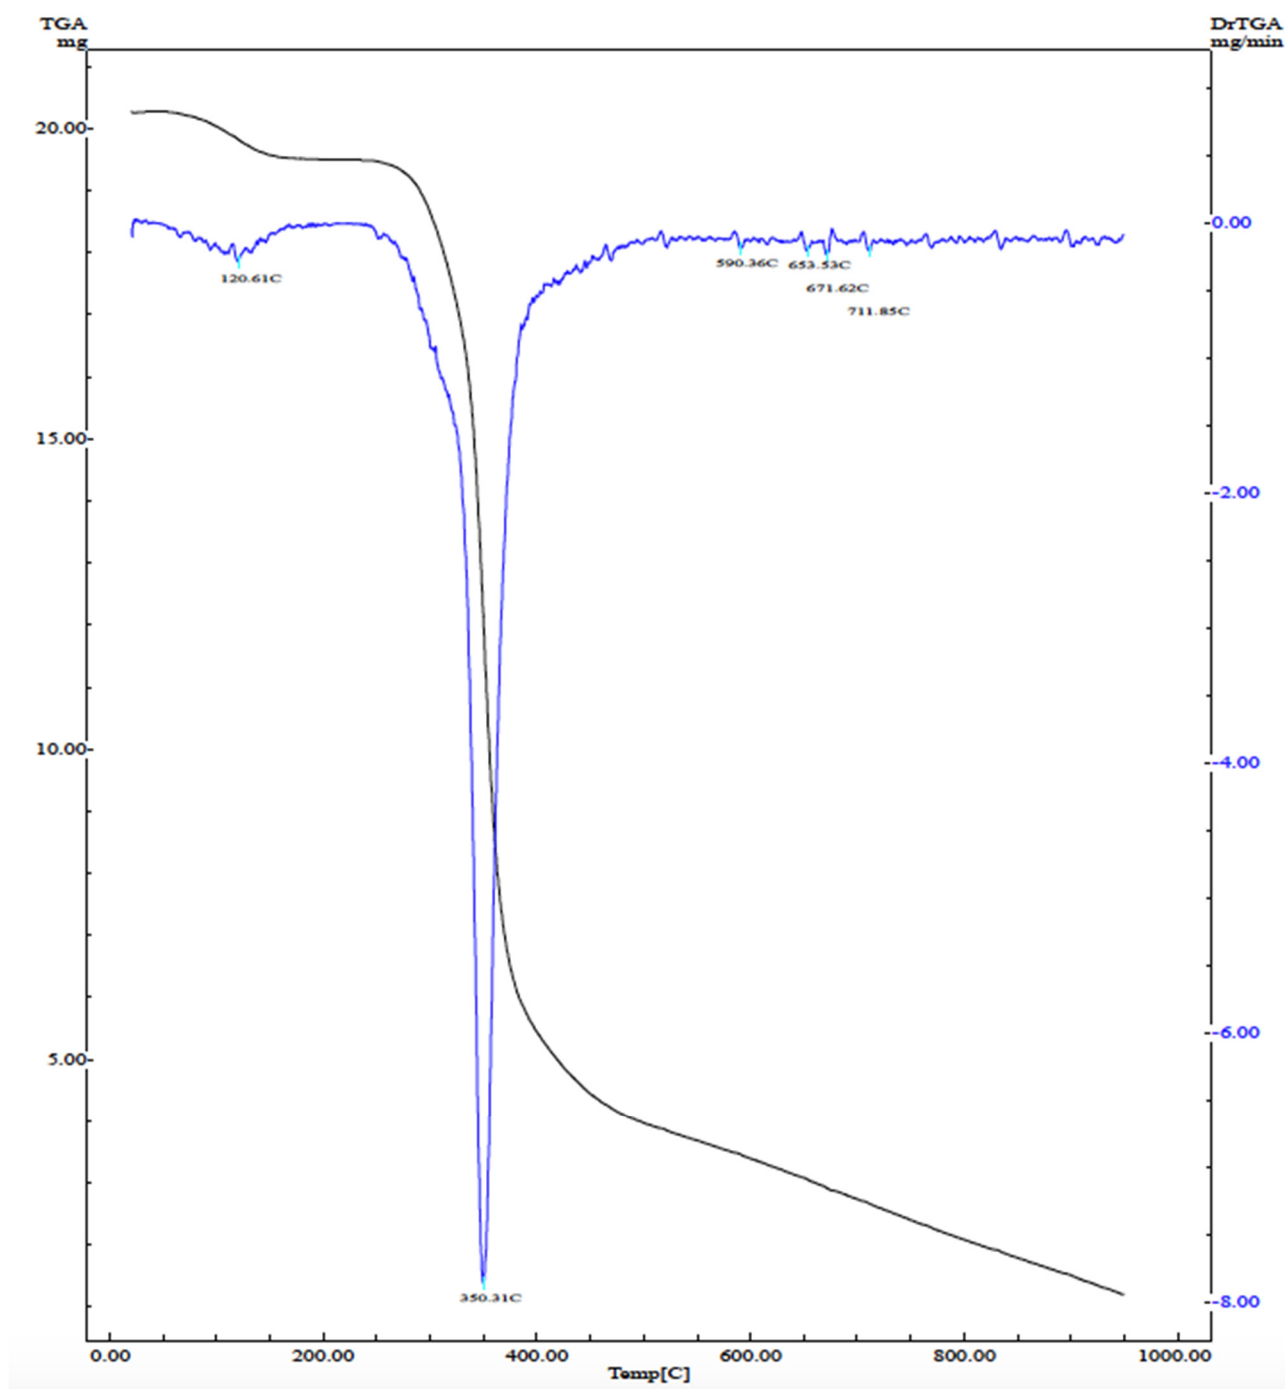

**Figure. S5** Derivative TGA of **pSt**. In black is shown the evolution of the mass of the sample as a function of the temperature and in blue the first derivative

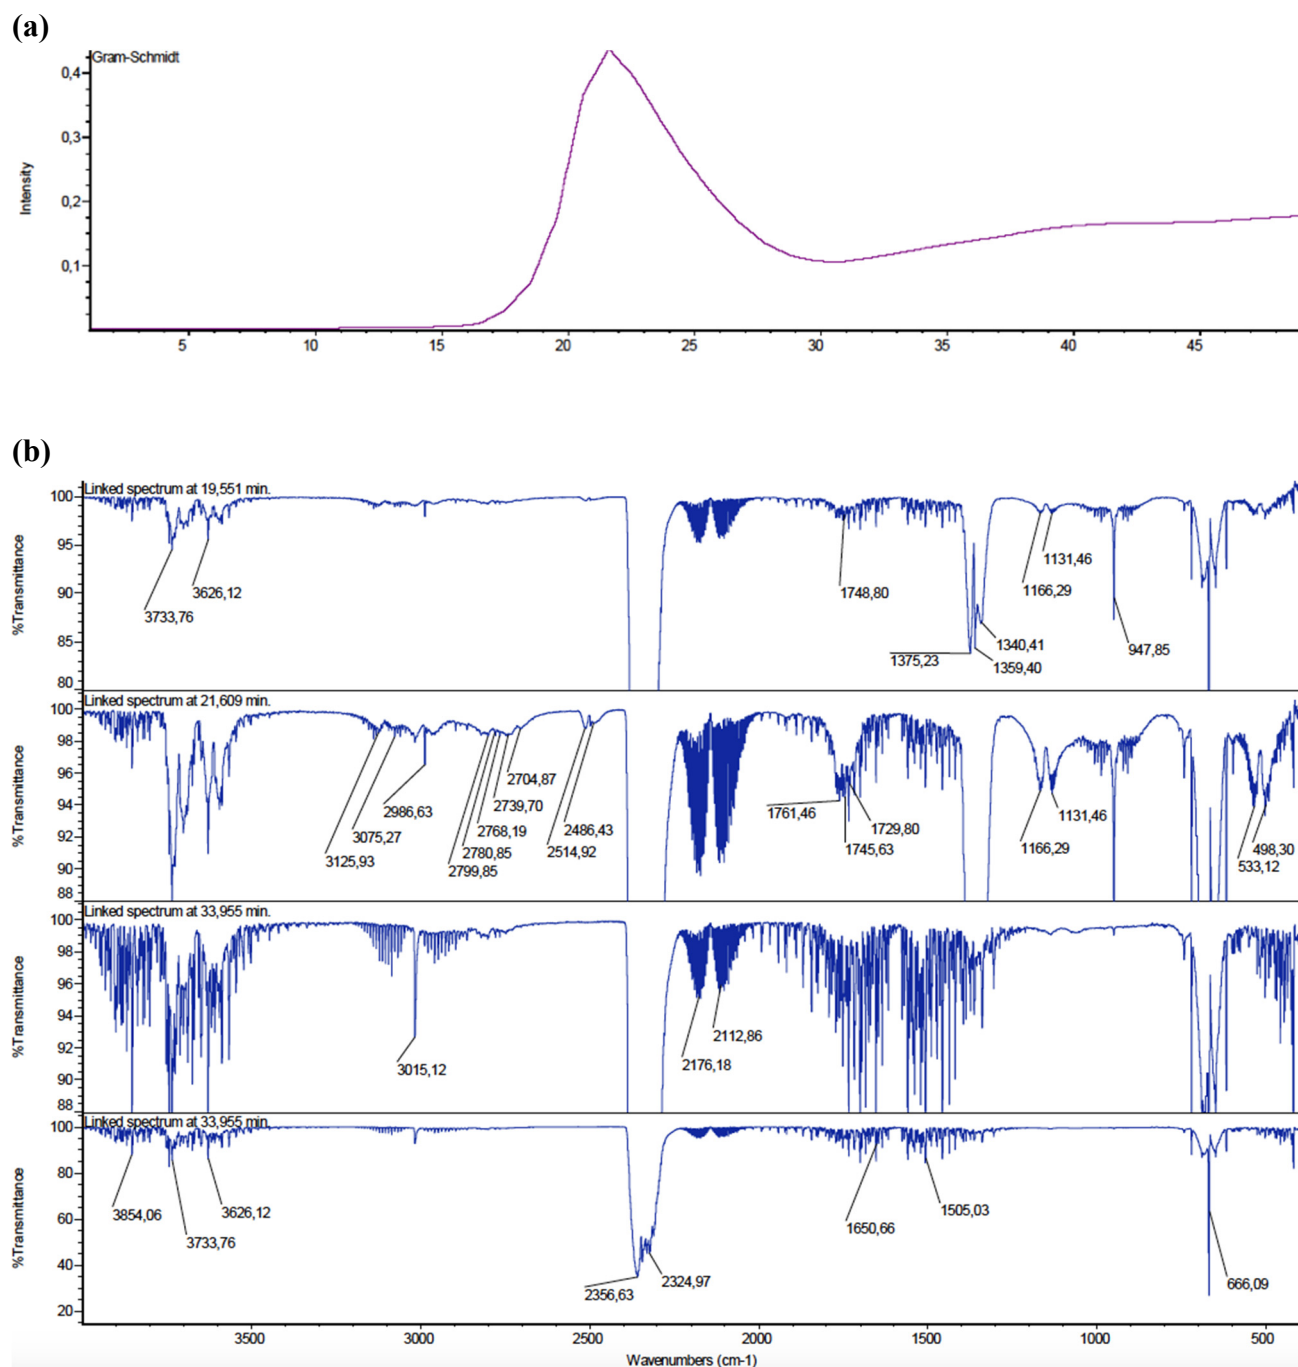

**Figure. S6.** IR-TGA of **pSt**. (a) Gram-Schmidt. (b) Most representative signals at three single time points 19.6 min, 21.6 min and 34.0 min. The delay between the TG and the FTIR detector is from 4 to 5 min.

(a)

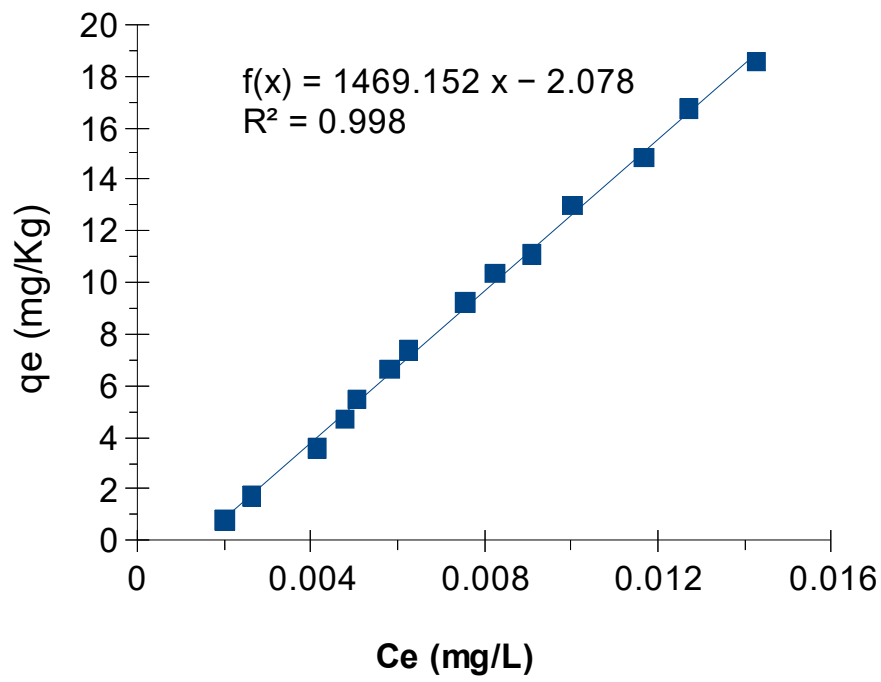

(b)

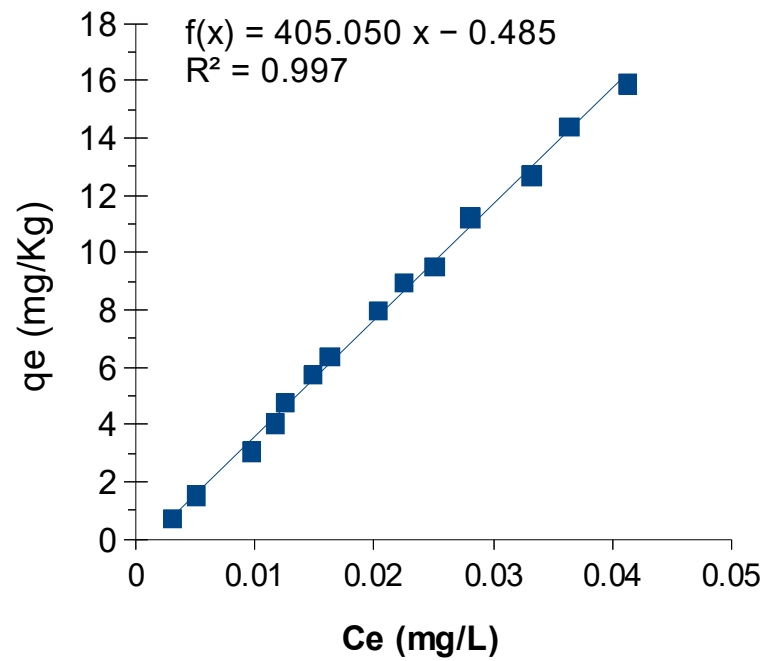

**Figure. S7.** Estimation of the sorption coefficient of CIP (a) and OFL (b) on pSt.



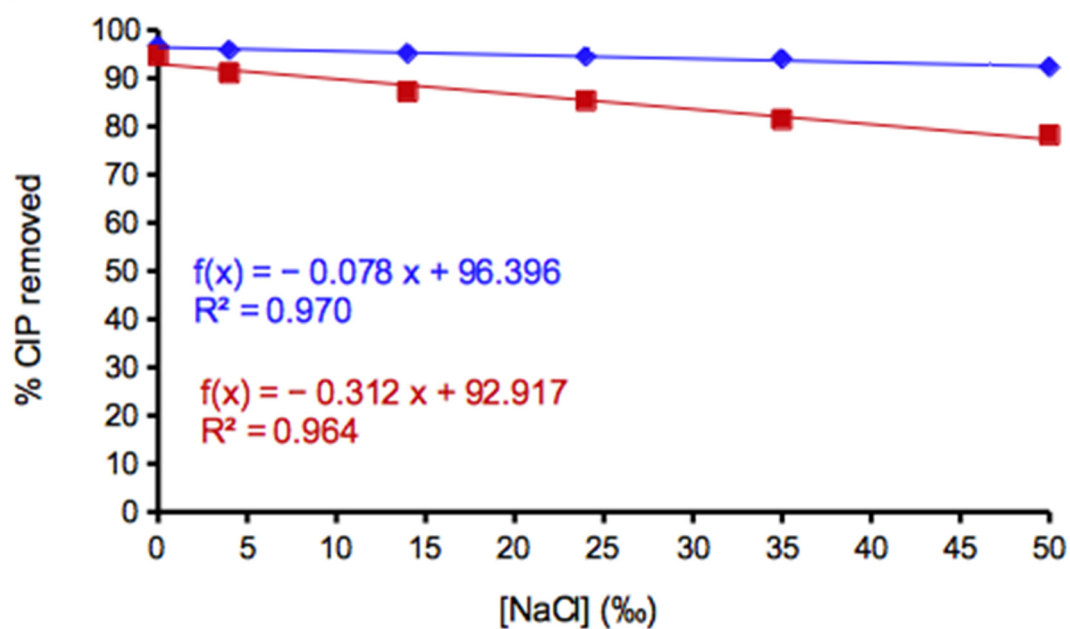

**Figure. S8.** Negative effect of the salinity on the sorption of CIP on **pSt** (red) and improvement of the performance by buffering to pH 8 (blue)

(a)

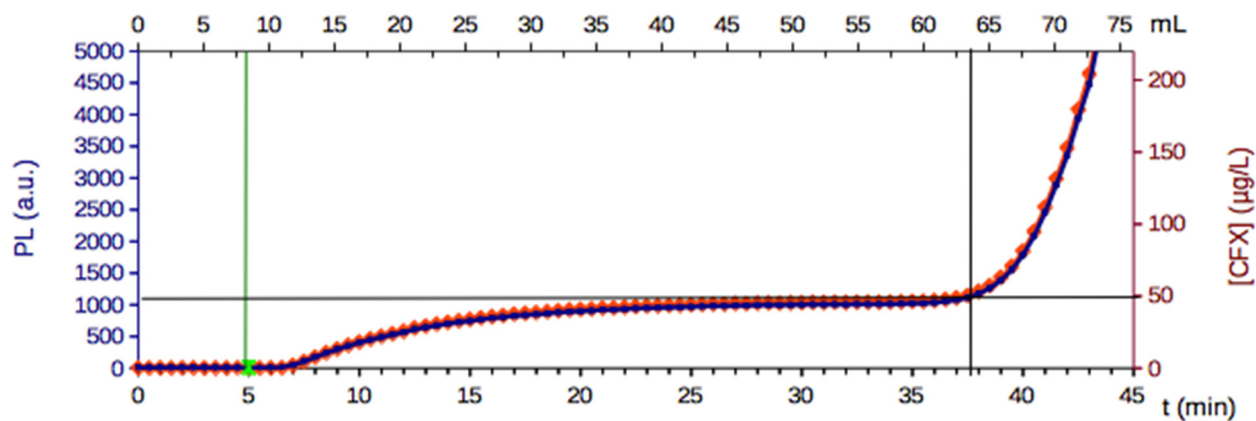

(b)

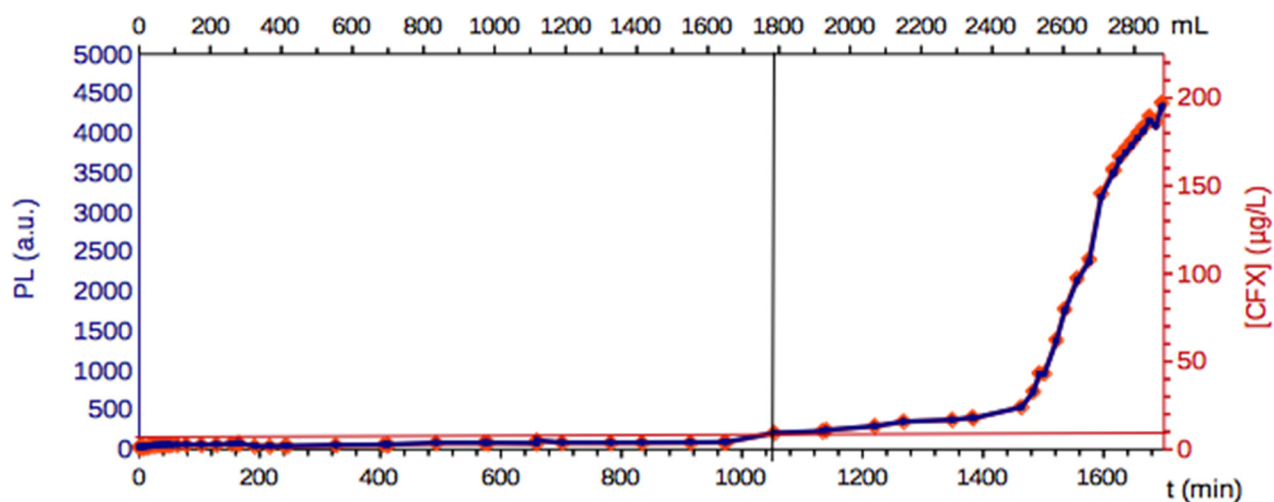

**Figure. S9.** Fixed bed studies of the sorption of CIP on **pSt**. Photoluminescence (arbitrary units, in blue) and concentration of CIP ( $\mu\text{g/L}$ , in red) of a solution of 10 mg/L (a) and 200  $\mu\text{g/L}$  (b) flown through the regenerated **pSt** (0.5 g) packed into a 2.5 mL syringe. The green line in (a) marks the initiation of pumping the solution of CIP.

**Table S1.** Equations of the isotherm model assayed for the fitting of the experimental sorption data as defined by ISOT\_calc [31,43].

| <b>Isotherm<br/>(# parameters)</b> | <b>Equation (<math>q_e = \dots</math>)</b>                                                                    | <b>Parameter definition [43]</b>                                                                                                       |
|------------------------------------|---------------------------------------------------------------------------------------------------------------|----------------------------------------------------------------------------------------------------------------------------------------|
| Langmuir<br>(2)                    | $S_T \frac{K_L \cdot C_e}{1 + K_L \cdot C_e}$                                                                 | $S_T$ is maximum adsorption capacity<br>$K_L$ is affinity constant                                                                     |
| Freundlich<br>(2)                  | $K_F \cdot C_e^N$                                                                                             | $K_F$ is adsorption potential<br>$N$ is strength constant associated to heterogeneity (for homogenous systems $N=1$ )                  |
| Temkin<br>(2)                      | $k_1 \cdot \ln(C_e) + k_2$                                                                                    | $k_1$ and $k_2$ are constants of Temkin isotherm and $k_1$ is related to sorption heat                                                 |
| Vieth-Sladek<br>(3)                | $K_D \cdot C_e + \frac{S_T \cdot b \cdot C_e}{1 + b \cdot C_e}$                                               | $K_D$ and $b$ are Vieth-Sladek constants<br>$S_T$ is the maximum adsorption capacity                                                   |
| Redlich-Peterson<br>(3)            | $S_T \frac{k \cdot C_e}{1 + (k \cdot C_e)^N}$                                                                 | $S_T$ is maximum adsorption capacity<br>$k$ is related to constants of Redlich-Peterson model<br>$N$ ranges from 0 to 1                |
| 2-sites Langmuir<br>(4)            | $\frac{S_{T1} \cdot k_1 \cdot C_e}{1 + k_1 \cdot C_e} + \frac{S_{T2} \cdot k_2 \cdot C_e}{1 + k_2 \cdot C_e}$ | $S_{T1}$ and $S_{T2}$ are the maximum adsorption capacity for sites 1 and 2<br>$K_1$ and $K_2$ are affinity constant for sites 1 and 2 |

**Table S2.** Elemental analysis of cross-linked polymers. Results are expressed as means  $\pm$  SD(n = 3)

|            | <b>pSt</b>        | <b>pDx</b>        | <b>pCD-Dx</b>     |
|------------|-------------------|-------------------|-------------------|
| <b>% C</b> | 41.04 $\pm$ 1.387 | 39.77 $\pm$ 0.381 | 40.13 $\pm$ 0.255 |
| <b>% H</b> | 7.45 $\pm$ 0.236  | 7.49 $\pm$ 0.307  | 7.81 $\pm$ 0.116  |
| <b>% S</b> | 7.16 $\pm$ 0.453  | 7.40 $\pm$ 0.080  | 7.51 $\pm$ 0.163  |

**Table S3.** Isotherm models that fail the non-linear fitting of the sorption of CIP and OFL on pSt.

|                | Langmuir                                                                                                                                                                       | Vieth-Sladek                                                                                                                                                                                                                                     | Redlich-Peterson                                                                                                                                                                                                                                  | 2 sites Langmuir                                                                                                                                                                                                                                                                                                                      |
|----------------|--------------------------------------------------------------------------------------------------------------------------------------------------------------------------------|--------------------------------------------------------------------------------------------------------------------------------------------------------------------------------------------------------------------------------------------------|---------------------------------------------------------------------------------------------------------------------------------------------------------------------------------------------------------------------------------------------------|---------------------------------------------------------------------------------------------------------------------------------------------------------------------------------------------------------------------------------------------------------------------------------------------------------------------------------------|
| <b>CIP-pSt</b> | $S_T=1.033 \times 10^3$<br><i>r.s.d. (%)</i> = $1.6 \times 10^3$<br>$K_L=1.119 \times 10^{-0}$<br><i>r.s.d. (%)</i> = $1.6 \times 10^3$<br><i>MWSE</i> = $4.82 \times 10^{-2}$ | $K_D=1.144 \times 10^3$<br><i>r.s.d. (%)</i> = $7.7 \times 10^0$<br>$S_T=1.000 \times 10^{-1}$<br><i>r.s.d. (%)</i> = $2.6 \times 10^6$<br>$b=1.000 \times 10^0$<br><i>r.s.d. (%)</i> = $2.6 \times 10^6$<br><i>MWSE</i> = $4.71 \times 10^{-2}$ | $S_T=2.619 \times 10^3$<br><i>r.s.d. (%)</i> = $1.8 \times 10^6$<br>$K=8.733 \times 10^{-1}$<br><i>r.s.d. (%)</i> = $1.8 \times 10^6$<br>$N=1.000 \times 10^0$<br><i>r.s.d. (%)</i> = $2.6 \times 10^6$<br><i>MWSE</i> = $4.71 \times 10^{-2}$    | $S_{T1}=1.038 \times 10^3$<br><i>r.s.d. (%)</i> = $1.8 \times 10^3$<br>$K_{L1}=1.114 \times 10^0$<br><i>r.s.d. (%)</i> = $1.8 \times 10^3$<br>$S_{T2}=1.020 \times 10^3$<br><i>r.s.d. (%)</i> = $2.7 \times 10^6$<br>$K_{L2}=1.114 \times 10^{-3}$<br><i>r.s.d. (%)</i> = $2.7 \times 10^6$<br><i>MWSE</i> = $4.82 \times 10^{-2}$    |
| <b>OFL-pSt</b> | $S_T=5.468 \times 10^5$<br><i>r.s.d. (%)</i> = $1.2 \times 10^5$<br>$K_L=6.381 \times 10^{-4}$<br><i>r.s.d. (%)</i> = $1.2 \times 10^5$<br><i>MWSE</i> = $1.29 \times 10^{-2}$ | $K_D=3.666 \times 10^2$<br><i>r.s.d. (%)</i> = $4.3 \times 10^0$<br>$S_T=1.000 \times 10^0$<br><i>r.s.d. (%)</i> = $1.3 \times 10^6$<br>$b=1.000 \times 10^0$<br><i>r.s.d. (%)</i> = $1.3 \times 10^6$<br><i>MWSE</i> = $1.14 \times 10^{-2}$    | $S_T=1.023 \times 10^3$<br><i>r.s.d. (%)</i> = $8.9 \times 10^5$<br>$K=7.164 \times 10^{-1}$<br><i>r.s.d. (%)</i> = $8.9 \times 10^5$<br>$N=1.000 \times 10^{-0}$<br><i>r.s.d. (%)</i> = $1.3 \times 10^6$<br><i>MWSE</i> = $1.14 \times 10^{-2}$ | $S_{T1}=5.605 \times 10^5$<br><i>r.s.d. (%)</i> = $5.1 \times 10^5$<br>$K_{L1}=6.540 \times 10^{-4}$<br><i>r.s.d. (%)</i> = $5.1 \times 10^5$<br>$S_{T2}=5.468 \times 10^3$<br><i>r.s.d. (%)</i> = $1.3 \times 10^6$<br>$K_{L2}=6.381 \times 10^{-4}$<br><i>r.s.d. (%)</i> = $1.3 \times 10^6$<br><i>MWSE</i> = $1.14 \times 10^{-2}$ |

## References

31. Beltrán, J.L.; Pignatello, J.J.; Teixidó, M. ISOT\_Calc: A Versatile Tool for Parameter Estimation in Sorption Isotherms. *Comput. Geosci.* **2016**, *94*, 11–17. <https://doi.org/10.1016/j.cageo.2016.04.008>.
43. Majd, M.M.; Kordzadeh-Kermani, V.; Ghalandari, V.; Askari, A.; Sillanpää, M. Adsorption Isotherm Models: A Comprehensive and Systematic Review (2010–2020). *Sci. Total Environ.* **2022**, *812*, 151334. <https://doi.org/10.1016/j.scitotenv.2021.151334>.
